1 **Qualitative Changes in the SARS-CoV-2 Antibody Response in the Post-Infection Phase Impact**  
2 **the estimates of infections in Population-Based Seroprevalence Studies**

3  
4 Craig Fenwick<sup>‡1</sup>, Antony Croxatto<sup>‡2</sup>, Alix T. Coste<sup>‡2</sup>, Florence Pojer<sup>‡5</sup>, Cyril André<sup>1</sup>, Céline Pellaton<sup>1</sup>,  
5 Alex Farina<sup>1</sup>, Jérémy Campos<sup>1</sup>, David Hacker<sup>5</sup>, Kelvin Lau<sup>5</sup>, Berend-Jan Bosch<sup>4</sup>, Semira Gonseth  
6 Nussle<sup>7</sup>, Murielle Bochud<sup>7</sup>, Valerie D’Acremont<sup>7</sup>, Didier Trono<sup>6\*</sup>, Gilbert Greub<sup>2,3\*</sup>, Giuseppe  
7 Pantaleo<sup>1,8\*</sup>

- 8  
9 1- Service of Immunology and Allergy, Department of Medicine, Lausanne University Hospital  
10 and University of Lausanne, Lausanne, Switzerland  
11 2- Institute of Microbiology, Lausanne University Hospital and University of Lausanne,  
12 Lausanne, Switzerland  
13 3- Service of Infectious Diseases, Lausanne University Hospital, Switzerland  
14 4- Virology Section, Infectious Diseases and Immunology Division, Department of Biomolecular  
15 Health Sciences, Faculty of Veterinary Medicine, Utrecht University, Utrecht, the  
16 Netherlands.  
17 5- Protein Production and Structure Core Facility, School of Life Sciences, École Polytechnique  
18 Fédérale de Lausanne (EPFL), Lausanne, Switzerland.  
19 6- School of Life Sciences, Ecole Polytechnique Fédérale de Lausanne, Lausanne, Switzerland.  
20 7- Centre for Primary Care and Public Health, University of Lausanne, Lausanne, Switzerland.  
21 8- Swiss Vaccine Research Institute, Lausanne University Hospital and University of Lausanne,  
22 Switzerland.

23  
24  
25  
26 Key words: SARS-CoV-2, serology, S protein trimer

27  
28  
29 Running title: Anti-S and anti-N protein antibody responses

30  
31 ‡Authors contributing equally

32  
33  
34 \*Corresponding authors: Prof. Giuseppe Pantaleo  
35 Service of Immunology and Allergy  
36 Lausanne University Hospital  
37 1011 Lausanne, Switzerland  
38 [giuseppe.pantaleo@chuv.ch](mailto:giuseppe.pantaleo@chuv.ch)

39  
40 Prof. Gilbert Greub  
41 Service of Microbiology  
42 Lausanne University Hospital  
43 1011 Lausanne, Switzerland  
44 [gilbert.greub@chuv.ch](mailto:gilbert.greub@chuv.ch)

45  
46 Prof. Didier Trono  
47 School of Life Sciences  
48 Ecole Polytechnique Fédérale de Lausanne  
49 Lausanne, Switzerland  
50 [didier.trono@epfl.ch](mailto:didier.trono@epfl.ch)

51 NOTE: This preprint reports new research that has not been certified by peer review and should not be used to guide clinical practice.

52 **Abstract**

53

54 In the present study, we have determined SARS-CoV-2-specific antibody responses in a cohort  
55 of 96 individuals during the acute phase of infection and in a cohort of 578 individuals enrolled  
56 in a seroprevalence population study in Switzerland including three groups, i.e. subjects with  
57 previous RT-PCR confirmed SARS-CoV-2 infections (n=90), 'positive patient contact' (n=177)  
58 and 'random selected subjects' (n=311). Six serological assays detecting predominantly IgG  
59 antibodies targeting either the Spike (S) and/or the nucleocapsid (N) proteins were used  
60 including also a Luminex based assay using an S protein in its native trimeric form. Antibody  
61 responses against the S and/or the N proteins were equally sensitive in the acute infection  
62 phase although differences in sensitivity (range 83 to 97% 16-33 days post-initial symptoms)  
63 were observed between the different assays and the Luminex S protein trimer assay was the  
64 most sensitive. Interestingly, antibody responses against the N protein appear to wane in the  
65 post-infection phase of the infection while those against the S protein persist over time, as  
66 indicated by the drop in sensitivity of the assays targeting the N protein (sensitivity range 71-  
67 77%). Assays detecting anti-N IgG antibodies may substantially underestimate the proportion  
68 of SARS-CoV-2 infections in the groups of 'patient positive contacts', i.e. 10.9 to 32.2%  
69 reduction ( $P<0.05$ - $<0.0001$ ) and in the 'random selected' general population, i.e. up to 45%  
70 reduction ( $P<0.05$ ). The overall reduction in seroprevalence for the total cohort ranged from  
71 9.4 to 31% ( $P<0.0009$ - $<0.0001$ ). Of note, the assay using the S protein in its native trimer form  
72 was more sensitive as compared to those using monomeric S proteins.

73 These results indicate that assays targeting the S protein, ideally the trimeric form,  
74 should be implemented as reference test to estimate SARS-CoV-2 infections in  
75 seroprevalence population studies.

76

77

78 **Introduction**

79  
80

81 The SARS-CoV-2 is currently causing a devastating pandemic with more than 12.7 million  
82 documented infections and more than 566'000 deaths, according to the latest WHO situation  
83 report from July 13<sup>th</sup>, 2020 <sup>1</sup>. However, the true incidence of the infection is largely  
84 underestimated, since in most countries asymptomatic and paucisymptomatic people are  
85 tested only if they came in direct contact with sick patients or belong to at-risk subgroups.  
86 Therefore, it is a public health urgency to perform large-scale population-based studies in  
87 order to determine rates of seroprevalence during the first wave of the SARS-CoV-2 pandemic  
88 and to implement continued surveillance with the combined use of viral detection tests such  
89 as RT-PCR and serological testing. Seroprevalence studies are also instrumental to determine  
90 the proportion of individuals with potential protective immunity <sup>2-4</sup>

91

92 Most commercially available SARS-CoV-2 serology assays detect IgG and some also IgA, IgM  
93 and/or all three immunoglobulin (Ig) subtypes. Detecting both IgA and IgG may increase  
94 sensitivity, particularly for people experiencing paucisymptomatic or asymptomatic infection.  
95 However, IgM does not seem to be of great benefit to overall sensitivity, since IgM  
96 appearance coincides with IgG antibodies during the early phase of infection, i.e. less than 15  
97 days after the onset of symptoms and may increase the likelihood of false positive results due  
98 to cross-reactivity <sup>5,6</sup>.

99

100 One of two proteins serve as baits in the majority of serological assays: the nucleocapsid  
101 protein (N) and the Spike protein (S). It has been suggested that the serological assays  
102 targeting the S protein are more specific while those targeting at N may be more sensitive,  
103 particularly in the early phase of infection <sup>7</sup>.

104

105 A comparison of 17 different serological assays using sera from hospitalized patients with  
106 moderate to severe COVID-19 disease confirmed the overall higher sensitivity of assays  
107 targeting the N protein investigating <sup>8</sup>. In this study, the DiaSorin CLIA that targets the S  
108 protein only exhibited 92% sensitivity whereas the Epitepe Diagnostics ELISA and the Snibe  
109 assay that both target the N protein exhibited a sensitivity of 96% <sup>8</sup>. However, this increased

110 sensitivity of N-based assays might be at the expense of specificity, given the relatively high  
111 protein sequence similarity of the N protein of SARS-CoV-2 with nucleocapsid proteins of  
112 other Coronaviridae and other viruses. Moreover, during the SARS outbreak (2002-2004),  
113 Chia et al observed that anti-N antibodies waned earlier than anti-S antibodies<sup>9</sup>. Thus, assays  
114 targeting the S proteins might be more specific and circumvent a possible decrease of  
115 antibodies, previously observed with N protein of the SARS virus. Thus, assays targeting the S  
116 protein might be more specific and circumvent a possible decrease in antibody titers, as the  
117 one previously observed after SARS. Furthermore, it is still unknown the durability of SARS-  
118 CoV-2 antibody response. Previous studies have shown early disappearance of antibodies to  
119 SARS-associated coronavirus after recovery<sup>10</sup> while other studies have shown longer  
120 durability of the antibody response<sup>11-14</sup>.

121

122 In a recent study, the only test scoring negative on 404 sera taken before the pandemics (in  
123 2018 & 2019) was the DiaSorin test, which targets the S protein; however, this high specificity  
124 was at the expense of a lower sensitivity (92%). We hypothesized that the lower sensitivity of  
125 most S-based assays reported so far might be explained due to their use of a monomeric form  
126 of S moieties, including the S1 or RBD domains, and that using S in its native trimeric  
127 conformation might increase sensitivity while preserving specificity.

128

129 We thus developed an IgA and IgG serological assay using the trimeric form of the S protein  
130 and the Luminex technology. This new assay was first evaluated using 96 sera obtained during  
131 the first 33 days of the acute phase of infection from subjects with moderate to severe  
132 symptoms, and further validated on 578 sera obtained in the post-infection phase mostly  
133 paucisymptomatic participants enrolled in the population-based seroprevalence study of the  
134 Vaud Canton in Switzerland. All sera were tested in parallel with five commercial assays  
135 targeting either the N and/or the S proteins. The Luminex assay exhibited the best accuracy  
136 with very high sensitivity in sera from both the acute and post-infection settings. In contrast,  
137 the tests targeting the N protein were less sensitive in detection seropositive donors in the  
138 post-infection phase.

139

140 The newly developed Luminex assay had the highest sensitivity in the sera of the post-  
141 infection phase thus providing more accurate estimates of SARS-CoV-2 infections in the  
142 general population.

143 Taken together, these results indicate that S protein based assays should be used in  
144 population-based seroprevalence studies and that the trimeric form is associated with greater  
145 sensitivity than the monomeric form.

146

147 **Results**

148

149 **Novel Serological Binding Assay using the S protein trimer**

150 A stabilized trimer of the full-length S protein, encompassing both its S1 and S2 moieties, was  
151 coupled to beads for capturing antibodies in a new Luminex assay. We hypothesized that  
152 conformational epitopes would be preserved in the trimeric S protein, providing a greater  
153 sensitivity to detect IgG antibodies (**Supplementary Figure 1A and B**). First, the specificity for  
154 IgG antibody binding was established with sera from 256 pre-COVID-19 pandemic healthy  
155 adults from 18 to 81 years of age and an additional set of 108 patients (**Figure 1A**), which  
156 included: pregnant women, individuals infected with alphacoronaviruses (NL63 and 229E),  
157 betacoronaviruses (OC43 and HKU1), HIV, Rubella, HSV1, HSV2, RSV, CMV, EBV, influenza or  
158 varicella, as well as patients suffering from autoimmune diseases such as Lupus. The signal  
159 distribution for all SARS-CoV-2 negative sera was similar for the 256 pre-COVID-19 healthy  
160 adults and for the diverse panel of 108 subjects. A cut-off for positivity was set at 4-fold above  
161 a negative control standard, which is slightly more than four standard deviation above the  
162 mean of all negative control samples (mean MFI ratio  $0.84 + 4 \times 0.75$  SD). Using this threshold,  
163 only one sera of the 256 pre-COVID-19 people and two patients with acute HIV or CMV viral  
164 infections gave a positive signal (**Figure 1 A**). As such, the Luminex assay using the stable  
165 trimeric S protein gave a high overall specificity of 99.2% and no cross-reactive antibodies  
166 were detected in sera from people infected with pre-pandemic coronaviruses or from  
167 patients with autoimmune diseases that can produce polyreactive antibodies. Considering  
168 that two of the three false positives from the 364 SARS-CoV-2 negative donors had MFI signals  
169 less than 6 (**Figure 1A**), an additional criteria for positivity was established for large general  
170 population screens, including the post-infection cohort. Here, sera with signal intensities  
171 between 4 and 6 were defined as being at the limit of positivity, which increases the assay  
172 sensitivity to 99.7% with only one acute HIV infected subject having a 6.8 MFI signal.

173

174 The sensitivity of the assay was next evaluated using sera from 96 acutely infected SARS-CoV-  
175 2 PCR-positive patients with blood sampling at 0-5 days, 6-10 days, 11-15 days and 16-33 days  
176 post-onset of symptoms (POS). As anticipated, sera collected during the early stage of the  
177 infection (0-5 days POS) had low or undetectable levels of anti-S protein IgG antibodies, with  
178 a rate of positivity of 12.5% (1 in 8 subjects; **Figure 1B**). Seropositivity increased to 42.1%

179 (8/19) at 6-10 days POS and to 91.7% (33/36) at 11-15 days POS. Almost all patients with  
180 symptoms for 16-33 days (28/29; 96.6%) displayed high antibody titers for the S protein. A  
181 mean MFI signal ratio of 85 was obtained with the Luminex assay with sera collected from  
182 these patients 16-33 days POS, which was significantly higher than the signal obtained with  
183 sera from all other time categories ( $P = 0.05$  relative to 11-15 days and  $P < 0.0001$  relative to  
184 0-5 days and 6-10 days POS; Mann-Whitney test). Interestingly, the only subject that was  
185 negative in the S protein trimer assay at day 25 post-onset of symptoms became seropositive  
186 when re-tested seven days later. Since signal intensity often comes at the expense of  
187 specificity, it is all the more important that the Luminex assay using the S protein trimer  
188 provides high MFI signals, high detection of PCR-positive donors yet exceptional specificity  
189 with negative results with sera from pre-COVID-19 healthy donor and patients hospitalized  
190 prior to November 2019.

191

### 192 **Quantitative Luminex assay for anti-Spike IgG antibodies**

193 Apart from the identification of seropositive subjects, the quantitation of the anti-SARS-CoV-  
194 2 antibodies provides valuable insight into the extent of the humoral immune response and  
195 its persistence over time. Using the S protein trimer Luminex assays, we generated a standard  
196 binding curve with the commercially available CR3022 anti-S1 IgG1 antibody (**Figure 1C**). This  
197 clone was initially identified as a neutralizing antibody for SARS-CoV-1, but was subsequently  
198 shown to bind specifically to the SARS-CoV-2 Spike protein<sup>15</sup>. Evaluation of serum dilutions  
199 from 1/300 down to 1/24'000 allowed to precisely determine the anti S protein IgG antibody  
200 concentrations that ranged from 54  $\mu\text{g/ml}$  to 820  $\mu\text{g/ml}$  in a panel of sera tested from patients  
201 with acute infection (**Figure 1D**). All the commercially available assays are semi-quantitative  
202 and thus the Luminex based S trimer assay is the only one providing an accurate quantification  
203 of the magnitude of the SARS-CoV-2 antibody response.

204

### 205 **Specificity and sensitivity of IgA antibody binding in the Luminex S protein trimer assay**

206 We next evaluated the Luminex S protein trimer assay for the detection of anti-SARS-CoV-2  
207 IgA antibodies. We established assay specificity and a cut-off threshold for positivity by  
208 screening sera from pre-COVID-19 healthy adults. Using four standard deviations above the  
209 standard negative control, this assay provided a 98.5% specificity in the 256 sera tested. The  
210 sensitivity of the Luminex IgA assay was estimated on 81 out of 96 acute infected SARS-CoV-

211 2 patients' sera with positive detections ranging from 33.3% of patients at 0-5 days POS with  
212 seropositivity increasing to 68.8% in patients from the 6-10 days group. At 11-15 and 16-33  
213 days POS, IgAs were detected in 94.4% and 90% of the cases, respectively (**Figure 2**).

214

### 215 **Comparison of Immunoassays targeting the S and N SARS-CoV-2 proteins during the acute** 216 **phase of infection**

217 The new Luminex S protein trimer IgG assay was compared with five commercially available  
218 SARS-CoV-2 immunoassays: i) two ELISAs from EuroImmun and Epitepe Diagnostics detecting  
219 IgG against the S1 and N proteins, respectively, ii) two CLIA from Diasorin and Snibe detecting  
220 IgG against S and S+N proteins, respectively, and iii) a pan-Ig ECLIA from Roche targeting the  
221 N protein. Since the commercial assays provide semi-quantitative estimates of the antibody  
222 response, semi-quantitative estimates generated from the Luminex assay were used for the  
223 comparison analyses. We performed the comparison on the same set of 96 sera from patients  
224 with acute infection and stratified based on time between symptoms onset and sera  
225 collection as shown in **Figures 1B**. Small differences in the number of sera tested across assays  
226 is due to insufficient volume of some samples. We evaluated the specificity of the six tests on  
227 a common panel of 65 pre-COVID-19 pandemic sera sampled before November 2019.

228 An increased in sensitivity was observed over time post-symptoms with all six assays (**Figure**  
229 **3 A-B, Table 1**). After 10 days POS, all assays but the Diasorin SARS-CoV-2 IgG kit (57%)  
230 reached a sensitivity above 70 %. Three assays, including the Luminex S protein trimer IgG  
231 assay, reached a sensitivity greater than 90% after 15 days POS. The three other assays  
232 exhibited a sensitivity slightly lower than 90% at 16-33 days POS, i.e. the Epitepe diagnostic  
233 ELISA IgG test (89%), the EuroImmun ELISA IgG test (88%), and the Diasorin SARS-CoV-2 IgG  
234 CLIA kit (83%) (**Figure 3 B and C; Table 1**). All six tests had a specificity equal or above 97%  
235 (**Figure 3 C**) and none displayed cross-reactivity with sera from patients positive for 229E,  
236 OC43, HKU1, NL63 coronaviruses (**Figure 1A**).

237

238 Taken together, these results indicate that the sensitivity of serological assays targeting the S  
239 and/or the N proteins are similar on sera taken during the acute phase of infection.

240 Of note, we have also performed head-to-head comparison of trimeric versus monomeric S  
241 proteins IgG responses within the Luminex assay. The responses observed in the Luminex  
242 assay with the S monomeric proteins were similar in sensitivity to those detected in other



243 assays using monomeric proteins but inferior to those obtained with the trimeric S protein  
244 **(Supplemental Figure 2A and B).**

245

246 We also compared the Luminex S protein trimer IgG and IgA assay with the EuroImmun ELISA  
247 IgG and IgA test. We evaluated these four tests using 81 sera from the acute phase patients.  
248 We observed that the two IgA tests detected anti-SARS-CoV-2 antibodies earlier than the IgG  
249 assays. Between 0 and 5 days POS, the Luminex IgA and EuroImmun IgA tests showed a  
250 sensitivity of 33% and 22%, respectively, and the corresponding IgG tests had sensitivities of  
251 only 11% (**Table 2**). Between 6 and 10 days POS, the Luminex IgA and EuroImmun IgA tests  
252 showed a sensitivity of 69% and 63%, respectively, compared to the Luminex IgG test with a  
253 sensitivity of 44% and EuroImmun IgG of 31%. Comparing IgA and IgG positivity for 0 to 10  
254 days POS showed a clear trend with anti-S protein IgA antibodies detected earlier than IgG  
255 during the acute phase of infection ( $P=0.077$  for Luminex and EuroImmun tests independently  
256 that increases to  $P=0.006$  with the artificial combining of results from the two assay;  
257 McNemar test). Although both IgA antibody tests show this same trend, it appeared that the  
258 Luminex S protein trimer IgA assay was systematically more sensitive (56%) than the  
259 EuroImmun ELISA IgA tests (48%) in all early-infected subjects up to 10 days POS (**Table 2**).

260

### 261 **Comparison of Immunoassays targeting the S and N SARS-CoV-2 proteins during the post-** 262 **infectious phase of infection and for seroprevalence studies**

263 We next evaluated the performance of the six SARS-CoV-2 assays targeting the N and/or S  
264 proteins on 578 sera as part of a seroprevalence population study of the Vaud Canton in  
265 Switzerland, while being blind to the seropositivity status. These comparisons included 90  
266 sera sampled from mildly to paucisymptomatic patients tested positive by RT-PCR, 177 sera  
267 sampled from positive contacts of RT-PCR positive subjects, and 311 sera sampled from  
268 undefined, randomly selected people from the general population aged 6 months and over.  
269 Results of the comparisons are shown in **Figure 4**, and **Table 3**. As expected, a good correlation  
270 of signal intensities was observed between the Luminex IgG assay using the S protein trimer  
271 and the other S protein targeting assays, while a poorer correlation was observed with anti-  
272 N assays (**Figure 4**).

273

274 In the 90 sera sampled from RT-PCR positive patients (**Figure 4**, blue dots), the Luminex IgG  
275 assay demonstrated the best sensitivity (96.7%), followed by the Roche pan-Ig ECLIA (95.6%).  
276 The two tests detecting anti-S antibodies, Diasorin and EuroImmun, both had significantly  
277 higher sensitivity (88.9%) than the Epitope Diagnostics ELISA anti-N (76.7%). Finally, the Snibe  
278 CLIA IgG test, which targets mainly the N protein and an undefined part of the S protein,  
279 showed a much lower sensitivity, i.e. 71.1% (**Table 3**).

280

281 In the sera of positive contact subjects (**Figure 4**, red dots), the Luminex IgG assay had the  
282 highest positivity rate (36.2%), again followed by the Roche pan-Ig ECLIA (32.2%). The  
283 EuroImmun and Diasorin gave similar positive rates of 29.9% and 28.2%, respectively while  
284 the Epitope Diagnostics and Snibe CLIA IgG tests exhibited the lowest positivity rate (26.0%  
285 and 24.3%, respectively) (**Figure 4** and **Table 3**).

286

287 With regard to the sera from randomly selected subjects for the population based  
288 seroprevalence study (**Figure 4**, green dots ; **Table 3**), we observed that tests detecting anti-S  
289 antibodies identified greater percentages of SARS-CoV-2 positive people (between 6.4 to  
290 4.2%), than the tests targeting anti-N antibodies (4.5 to 3.5%). Importantly, the Roche pan-Ig  
291 assay using the N protein antigen was the second most sensitive assay in the acute infected  
292 patients and the PCR-positive and positive contact subjects in the post-infection cohort, but  
293 conversely, was one of the least sensitive assays (3.9%) in detecting seropositive people  
294 randomly selected from the general population. The significantly higher sensitivities of the  
295 Luminex S protein trimer assay in the post-infection setting compared to all five other  
296 serological assays is highlighted in **Figure 5**. Compared to the other tests, the Luminex IgG  
297 assay detected 10.9% to 32.8% more positive sera in the positive contact group, 30% to 45%  
298 more positive tests in the randomly selected population-based samples and 17.9% to 35.7%  
299 more positive tests in a combined analysis of the contact group and population-based  
300 samples. In the overall post-infection set of 578 sera, the Luminex IgG assay performed  
301 significantly better and detected between 9.4% and 31% more seropositive participants than  
302 the other five assays (**Figure 5**).

303

304 Taken together, these results indicate that assays detecting anti-N IgG antibodies may  
305 substantially (i.e. up to 45%) underestimate the proportion of SARS-CoV-2 exposed individuals

306 compared to those detecting anti-S IgG antibodies in population-based seroprevalence  
307 studies.

308

## 309 **Discussion**

310

311 Population-based seroprevalence studies are important to monitor the dynamics of the  
312 pandemic, to have a better appreciation of the number of infections and to determine the  
313 proportion of the population that has developed specific SARS-CoV-2 immunity.  
314 Seroprevalence studies performed in Switzerland, Spain and in New York City indicate that a  
315 minor percentage of the population, ranging from 10 to 20% of individuals, has been infected  
316 with SARS-CoV-2 <sup>2-4,16-18</sup>. The estimates of SARS-CoV-2 infected individuals from  
317 seroprevalence studies may be substantially influenced by the sensitivity of the assays used  
318 to determine the antibody responses.

319 A large number of assays have been developed to detect IgG, IgA and IgM SARS-CoV-2 specific  
320 antibodies. These assays target either the S protein or the N protein. The validation of the  
321 assays with regard to the sensitivity and specificity has been mostly performed on sera from  
322 patients during the acute phase of infection <sup>16,19-21</sup>. Despite some differences in sensitivity  
323 between the various assays, assays targeting the N and the S proteins were considered as  
324 equally sensitive, with a generally higher sensitivity for those targeting N. Either assays,  
325 targeting either N or S, were therefore considered as equally suitable for population-based  
326 seroprevalence studies. However, limited information is yet available on the evolution of the  
327 antibody response during progression from the acute to the post-infection phase and, in  
328 particular, on the antibody responses against the two targets, S and N proteins. For these  
329 reasons, we evaluated antibody responses using six different assays targeting the N and/or  
330 the S proteins.

331 Our results indicate a substantial drop in sensitivity of the three assays targeting the N protein  
332 thus strongly suggesting a waning of the anti-N antibody responses in the post-infection  
333 phase. Importantly, the estimated seroprevalences are mostly impacted in the 'positive  
334 patient contacts' group and 'randomly selected' population-based samples with an  
335 underestimation ranging from 11 to 33% for the former and 30 to 45% for the latter group.

336 Of note, the new Luminex-based assay using the trimeric S protein showed a greater  
337 sensitivity than two assays using monomeric S1 or RBD. The underestimation of SARS-CoV-2

338 seropositive individuals was in the range of 18-22% in the ‘positive patient contacts’ and 30-  
339 35% in the population-based samples. The greater sensitivity of the Luminex assay using the  
340 trimeric S protein likely results from the conservation of conformational epitopes. This  
341 increased sensitivity was not obtained at the expense of cross-reactivity, since the specificity  
342 of the novel Luminex assay was 99%, in spite of including sera typically prone to cross-  
343 reactivity (i.e. from individuals with documented infection with other viruses, including  
344 coronaviruses or with lupus). Overall, the underestimation of SARS-CoV-2 seropositive  
345 individuals was less important in the ‘Positive RT-PCR patients’ group ranging from 1 to 26%.  
346 A recent study<sup>22</sup> has shown that 40% of asymptomatic individuals became seronegative over  
347 time. However, an assays detecting anti-N antibodies was used in this study. Based on our  
348 results demonstrating a waning of anti-N antibody response in the post-infection phase, it is  
349 likely that the loss of antibody response observed is due to the use of the anti-N assay rather  
350 than to a disappearance of the SARS-CoV-2 antibody response.

351 Additionally, the Luminex S protein trimer assay provides quantitative levels of anti-S protein  
352 IgG antibodies in donor sera, which may correlate with an effective neutralizing activity and  
353 the duration of a protective humoral response. Given that N protein antibodies are not  
354 neutralizing, this same correlation with N protein assays would be indirect at best and  
355 potentially misleading given our demonstration that antibody responses to N wane in post-  
356 infection subjects.

357 In addition to seroprevalence population studies, the use of a highly sensitive test is also  
358 important for patient care and diagnostic tests should exhibit high performance also during  
359 the post-infection period. In this regard, a number of late complications have been reported  
360 following SARS-CoV-2 infection, including Guillain-Barré syndrome, Kawasaki syndrome, hair  
361 losses, thrombo-embolic events and all these late events are recognized indications for  
362 serological testing<sup>19,23</sup>. Highly sensitive tests are also warranted for immunocompromised  
363 subjects suffering from hematological malignancies (lymphoma or leukemia) who may fail to  
364 develop any antibody response up to 38 days post-infection despite severe disease requiring  
365 prolonged intubation and artificial ventilation in the intensive-care unit<sup>24</sup>.

366 Furthermore, the availability of highly sensitive serological assay quantifying anti-S protein  
367 IgG antibodies together with assays measuring neutralizing antibodies are critical for the  
368 development of effective vaccines against SARS-CoV-2.

369 In conclusion, these results provide new insights in the evolution of the SARS-CoV-2 antibody  
370 response from the acute to the post-infection phase and indicate that the detection of  
371 antibody responses against the S protein and the use of trimeric S protein should be  
372 implemented as reference test to avoid large underestimation of SARS-CoV-2 infections in  
373 population-based seroprevalence studies.

374 Therefore, the detection of antibody responses against the S protein and the use of trimeric  
375 S protein as antigenic target should be implemented as reference test to provide the best  
376 estimates of SARS-CoV-2 infections in seroprevalence population studies.

377

378

379

380

381

382

383

384

385

386

387

388

389

390

391

392

393

394

395

396

397

398

399

400

## 401 **Material and Methods**

402

### 403 **Study populations**

404

#### 405 **Patients with acute infections**

406 Comparison of tests for acute/sub-acute phase of the infection was performed on 161 sera,  
407 including i) 96 sera, expected to be positive, sampled from hospitalized patients with severe  
408 to mild symptoms 0 to 45 days post onset of the symptoms and documented with a positive  
409 SARS-CoV-2 RT-PCR ; ii) 65 sera, expected to be negative, sampled before November 2020,  
410 presented as pre-COVID-19 sera, and including 18 samples from patient documented positive  
411 for a Human coronavirus (E229, OC43, HKU1, NL63) RT-PCR. Date of the symptoms onset were  
412 extracted from the electronic record of the 96 SARS-CoV-2 RT-PCR positive patients.

413

#### 414 **Post-infection cohort**

415 A second comparison of tests was performed on sera from the seroprevalence study of the  
416 Vaud Canton in Switzerland (SerocoViD) performed by the Centre for Primary Care and Public  
417 Health, University of Lausanne (Unisanté). Out of the 1,942 participants who provided a blood  
418 sample between May 4 and June 27, 2020, a subset of 578 subjects were included in the  
419 present analysis, of which: i) 90 subjects were expected to be positive—sampled from mostly  
420 mildly to paucisymptomatic patients (only 21% had been hospitalized) documented with a  
421 positive SARS-CoV-2 RT-PCR ; ii) 177 were sampled from contacts of RT-PCR positive subjects,  
422 and iii) 311 were randomly selected subjects in the general population. There were 304  
423 women (52.6%), and the mean age was 39.2 years (SD 24.2, range: 6 months to 90 years).

424

#### 425 **Pre-COVID-19 pandemic donors**

426 Negative control serum samples from 256 adult healthy donors with ages ranging for 18 to 81  
427 years of age were collected prior to November 2019 as part of the Swiss Immune Setpoint  
428 study sponsored by Swiss Vaccine Research Institute. Specificity tests for the Luminex S-  
429 protein assay with a diverse set of 108 patient sera included the 65 sera collected prior to  
430 November 2019 and used in the blinded tested performed with all six assays and an additional  
431 43 patient samples. This diverse set of samples consisted of sera from pregnant women  
432 (n=14), pre-pandemic coronavirus infected donors (OC43, E229, NL63 and HKU1; n=19),

433 patients with infectious diseases (HIV, Rubella, HSV1, HSV2, CMV, EBV, influenza and varicella;  
434 n=57) and patients with autoimmune diseases including Lupus (n=18). Study design and use  
435 of subject sera samples were approved by the Institutional Review Board of the Lausanne  
436 University Hospital and the 'Commission d'éthique du Canton de Vaud' (CER-VD) stated that  
437 authorization was not required.

438

#### 439 **Preparation of Luminex beads**

440 Luminex beads used for the serological binding assays were prepared by covalent coupling of  
441 SARS-CoV-2 proteins with MagPlex beads using the manufacture's protocol with a Bio-Plex  
442 Amine Coupling Kit (Bio-Rad, France). Briefly, 1 ml of MagPlex-C Microspheres (Luminex)  
443 were washed with wash buffer and then resuspended in activation buffer containing a freshly  
444 prepared solution of 1-ethyl-3-(3-dimethylaminopropyl) carbodiimide (EDC) and N-  
445 hydroxysulfosuccinimide (S-NHS), (ThermoFischer, USA). Activated beads were washed in PBS  
446 followed by the addition of 50 µg of protein antigen. The coupling reaction was performed  
447 at 4 °C overnight with bead agitation using a Hula-Mixer (ThermoFischer). Beads were then  
448 washed with PBS, resuspended in blocking buffer then incubated for 30 minutes with  
449 agitation at room temperature. Following a final PBS washing step, beads were resuspended  
450 in 1.5 ml of storage buffer and kept protected from light in an opaque tube at 4 °C. Each of  
451 the SARS-CoV-2 proteins was coupled with different coloured MagPlex beads so that tests  
452 could be performed with a single protein bead per well or in a multiplexed Luminex serological  
453 binding assay.

454

#### 455 **SARS-CoV-2 proteins evaluated in Luminex assay**

456 The S protein trimer was designed to mimic the native trimeric conformation of the protein  
457 in vivo and the expression vector was kindly provided by Prof. Jason McLellan, University of  
458 Texas, Austin; <sup>25</sup>. It encoded the prefusion ectodomain of the SARS-CoV-2 Spike with a C-  
459 terminal T4 foldon fusion domain to stabilize the trimer complex along with C-terminal 8x His  
460 and 2x Strep tags for affinity purification. The trimeric Spike protein was transiently expressed  
461 in suspension-adapted ExpiCHO cells (Thermo Fisher) in ProCHO5 medium (Lonza) at 5 x10<sup>6</sup>  
462 cells/mL using PEI MAX (Polysciences) for DNA delivery. At 1 h post-transfection, dimethyl  
463 sulfoxide (DMSO; AppliChem) was added to 2% (v/v). Following a 7-day incubation with  
464 agitation at 31 °C and 4.5% CO<sub>2</sub>, the cell culture medium was harvested and clarified using a



465 0.22  $\mu$ m filter. The conditioned medium was loaded onto Streptactin (IBA) and StrepTrap HP  
466 (Cytiva) columns in tandem, washed with PBS, and eluted with 10 mM desthiobiotin in PBS.  
467 The purity of S protein trimer was determined to be > 99% pure by SDS-PAGE analysis.

468

469 Receptor binding domain (RBD) and S1 SARS-CoV-2 proteins were prepared as previously  
470 described<sup>26</sup>. In initial characterization of the assays, serum dilutions of 1/50 down to 1/ 2'700  
471 were evaluated for SARS-CoV-2 PCR-positive subjects and healthy donors. A 1/300 dilution  
472 of serum was selected for screening patient samples since it showed a high MFI signal for all  
473 donors and a low background staining with serum samples from pre-COVID-19 pandemic  
474 healthy donors. In addition to the high positive signal and low background, <1  $\mu$ l of serum was  
475 needed to evaluate anti-SARS-CoV-2 antibody binding in the Luminex assay binding assays.

476

#### 477 **Luminex anti-SARS-CoV-2 antibody binding assay**

478 Luminex beads coupled with the Spike, RBD or S1 proteins were diluted 1/100 in PBS with 50  
479  $\mu$ l added to each well of a Bio-Plex Pro 96-well Flat Bottom Plates (Bio-Rad). Following bead  
480 washing with PBS on a magnetic plate washer (MAG2x program), 50  $\mu$ l of individual serum  
481 samples diluted at 1/300 in PBS, were added to the plate wells. Along with samples, three  
482 replicates of a 1/300 negative control pool of pre-COVID-19 pandemic healthy human sera  
483 (BioWest human serum AB males; VWR) were evaluated on each 96-well plate. Plates were  
484 sealed with adhesive film, protected from light with a dark cover and agitated at 500 rpm for  
485 60 minutes on a plate shaker. Beads were then washed on the magnetic plate washer and  
486 anti-human IgG-PE secondary antibody (OneLambda ThermoFisher) was added at a 1/100  
487 dilution with 50 $\mu$ l per well. Plates were agitated for 45 minutes, and then washed on the  
488 magnetic plate washer. Beads resuspended in 80  $\mu$ l of reading buffer were agitated 5 minutes  
489 at 700 rpm on the plate shaker then read directly on a Luminex FLEXMAP 3D plate reader  
490 (ThermoFisher). MFI signal for each test serum samples was divided by the mean signal for  
491 the negative control samples to yield an MFI ratio that normalized values between plates and  
492 between different Luminex instruments tested.

493

#### 494 **Immunoassays**

495 ELISA and CLIA were performed according to the manufacturers' instructions. EuroImmun and  
496 Epitope Diagnostic IgG ELISA were done manually for the essential of the protocol at the



497 exclusion of washing steps performed with a microplate washer (PW40, Bio-Rad, France).  
498 Lecture of the Optical densities (OD) was done with a microplate reader (800 TSI, BioTek,  
499 USA). Each sample was measured in duplicates. The LIAISON® SARS-CoV-2 IgG kit was  
500 performed on a Liaison® XL (Diasorin, Italy), and the MAGLUMI™ 2019-nCoV IgG and IgM kits  
501 were performed on a MAGLUMI™ 800 (Snibe, China). The Elecsys anti-SARS-CoV-2 was  
502 performed on a COBAS 6000 (Roche, Switzerland).

503

#### 504 **Statistical analyses**

505

506 The sensitivity of the different tests was calculated according to day post-symptoms on  
507 expected positive sera taken from patients with a positive RT-PCR. The RT-PCR was previously  
508 performed according to Corman et al.<sup>27</sup> on our automated molecular diagnostic platform <sup>28</sup>.

509

510 Sensitivity and specificity of the tests with 95% CI (Wilson/Brown method of GraphPad Prism  
511 8.3.0) were calculated with Excel and GraphPad prism. For comparisons between the Luminex  
512 assay and the five other serological assays, R<sup>2</sup> values were calculated using the Pearson test  
513 and the McNemar's test was used to determine the p-value significant differences for  
514 sensitivities in detecting seropositive subjects in the patient subsets within the post-infection  
515 cohort. All statistics were done with GraphPad prism.

516

517

518

519

520

521

522

523

524

525

526

527

528

529

530

531

532

533

534

535  
536  
537

## Figures and Figure legends

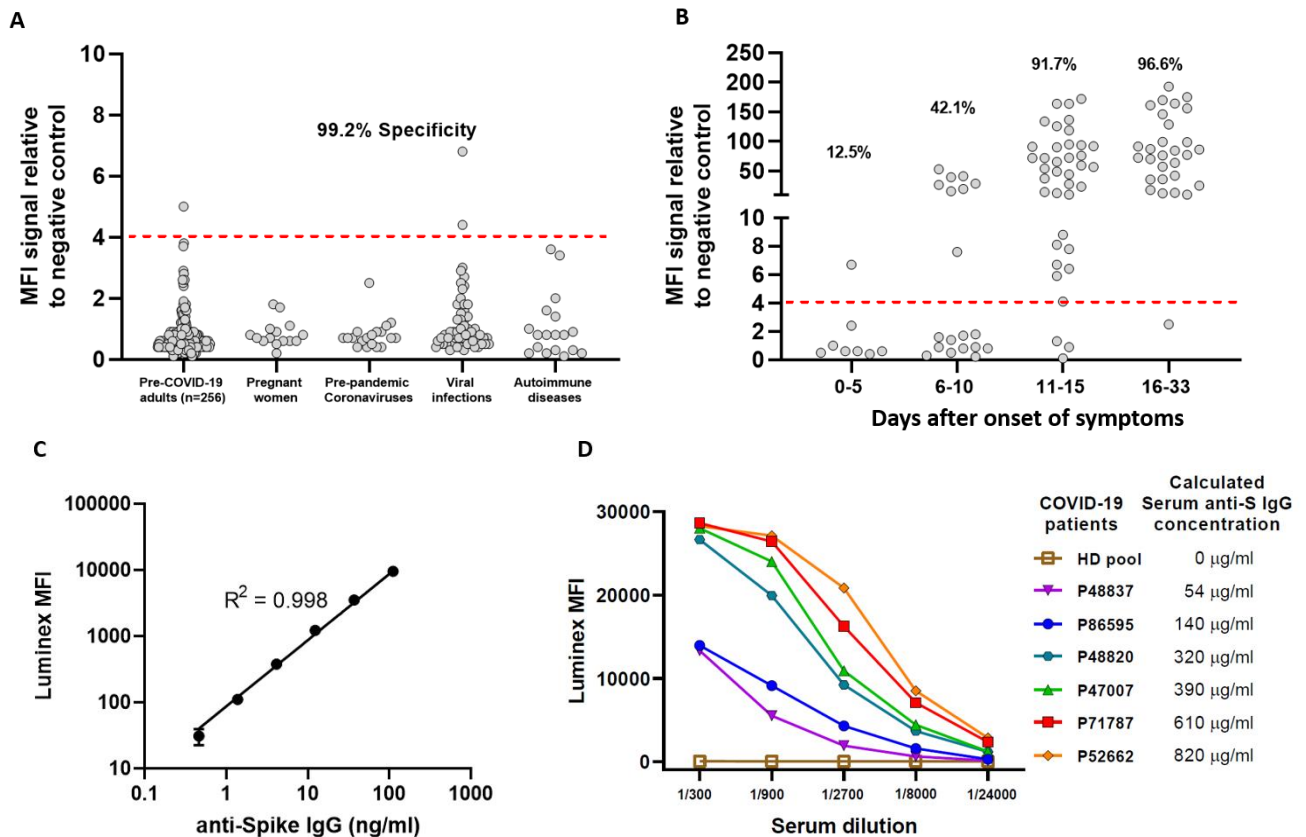

538

539

540

541

542

543

544

545

546

547

548

549

550

551

552

553

554

555

556

557

558

559

560

561

562

**Figure 1: Specificity and sensitivity of IgG antibody binding to the SARS-CoV-2 S protein trimer in a Luminex binding assay.** Luminex beads covalently coupled with SARS-CoV-2 S protein trimer were used to monitor IgG binding in assays performed with pre-COVID-19 pandemic negative control sera and sera from SARS-CoV-2 PCR positive donors. MFI signals for serum antibody binding was expressed as a ratio compared to a negative control pool of pre-COVID-19 pandemic human serum tested in parallel. **A**) Assay specificity was evaluated using the sera from pre-COVID-19 pandemic healthy adults (n=256; ages ranging between 18 to 81 years of age), pregnant woman, pre-pandemic coronavirus infected donors (OC43, E229, NL63 and HKU1), patients with infectious diseases (HIV, Rubella, HSV1, CMV, EBV, influenza and varicella) and patients with autoimmune diseases including Lupus. **B**) The sensitivity of the S protein trimer Luminex assays was evaluated with sera from acute infected SARS-CoV-2 PCR-positive donors at 0-5 days, 6-10 days, 11-15 days and 16-33 days post-onset of symptoms. The red dashed line in A and B corresponds to the 4.0 cut-off for positivity in the IgG Luminex assay that was established by using mean value + 4×SD of all 364 pre-COVID-19 pandemic serum samples shown in A. **C**) Quantitation of anti-S protein IgG antibody levels was performed by generating a standard curve for binding using the CR3022 IgG1 antibody that binds SARS-CoV-2 S protein. **D**) Using multiple dilutions of sera from COVID-19 patients, MFI signals between 100 and 10'000 in the linear part of the standard curve were used to calculate the serum concentration of anti-S protein IgG antibodies.

563

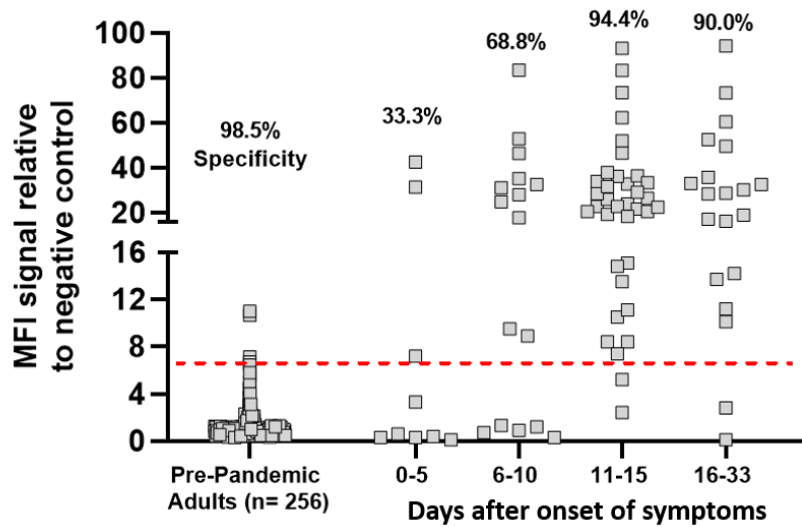

564

565

566 **Figure 2: Specificity and sensitivity of IgA antibody binding to the SARS-CoV-2 S protein**  
567 **trimer in a Luminex binding assay.** The Luminex S protein trimer assay was used to monitor  
568 IgA binding of antibodies in sera from pre-COVID-19 pandemic negative control donors and  
569 sera from acute SARS-CoV-2 PCR positive donors. The Luminex assay exhibited high specificity  
570 of 98.5% against a cohort of negative control donors and was effective at detecting IgA  
571 antibodies specific for S protein in most subjects in both the early stage (0 to 10 days) and  
572 later stage (11 to 33 days) after onset of symptoms in acute PCR-positive patients. The red  
573 dashed line corresponds to 6.5-fold MFI signal over the internal negative control and was  
574 established by using the mean value + 4×SD of the 256 pre-COVID-19 pandemic adult serum  
575 samples.

576

577

578

579

580

581

582

583

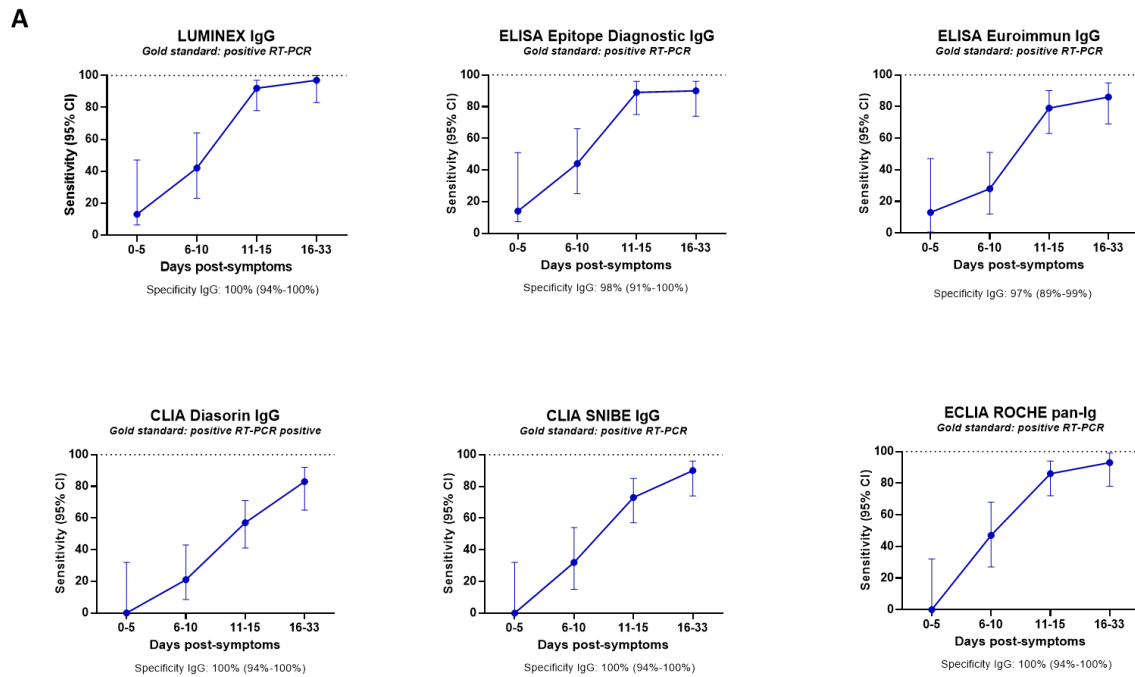

584

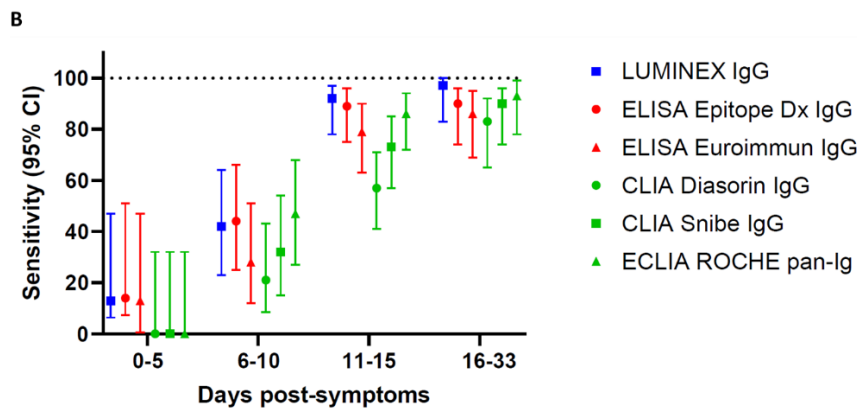

585

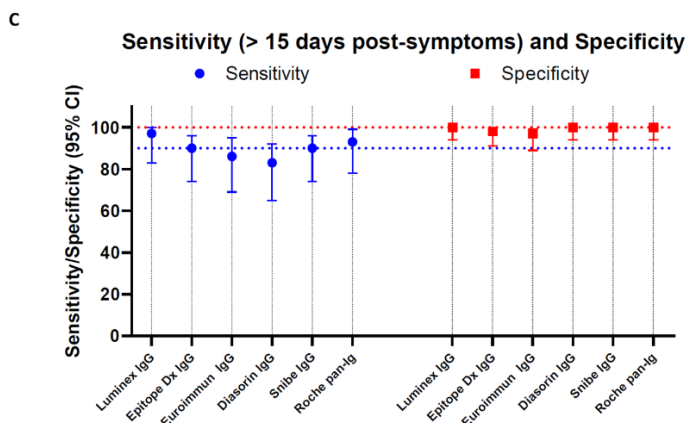

586

587 **Figure 3: Comparative analysis of six different SARS-CoV-2 serological assays in the profiling**  
 588 **of sera from acutely infected patients.** Sensitivity in detecting anti-SARS-CoV-2 specific IgG  
 589 antibodies is compared for our new Luminex S protein trimer assay and five other commercial  
 590 assay. **A-B)** Serum samples were grouped by the number of days after initial onset of  
 591 symptoms with sensitivity increasing in all assays with increased days post-symptom onset.  
 592 **C)** In the 16 to 33 days post-symptom group, the Luminex assay is among the most sensitive  
 593 and specific assays.

594  
595  
596

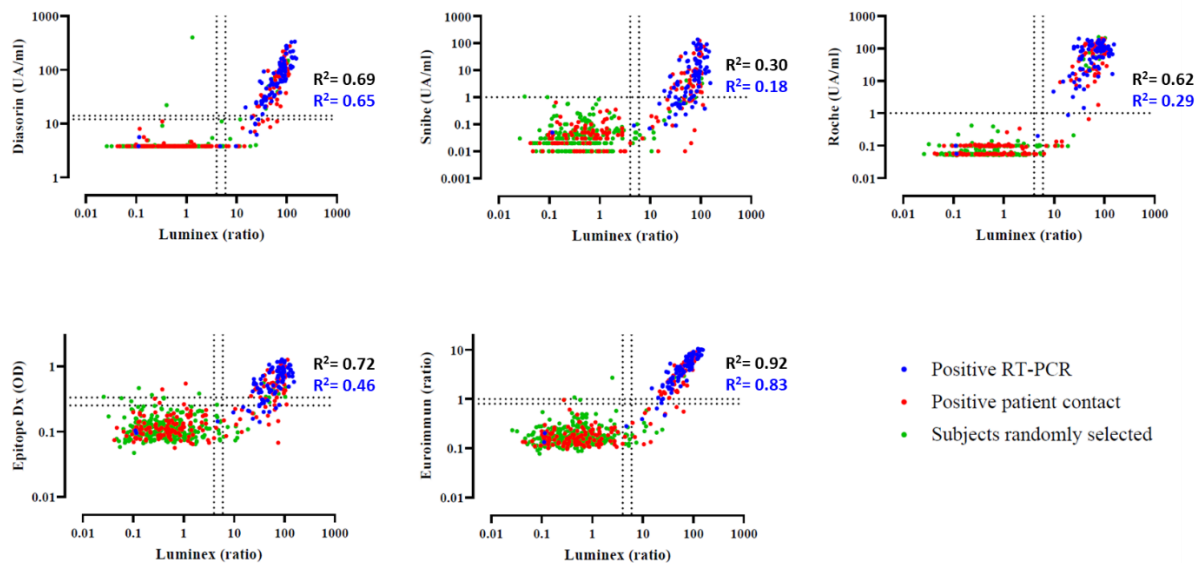

597  
598  
599  
600  
601  
602  
603  
604  
605  
606  
607  
608  
609  
610  
611  
612

**Figure 4: Comparative analysis of Luminex S protein trimer assay versus five commercial serological assays.** Signal intensities for the different subject sera in the post-infection cohort were compared between the Luminex and the five other serological assays. Collected sera were from patients with a documented positive SARS-CoV-2 RT-PCR (90 sera; blue dots), contacts with a SARS-CoV-2 RT-PCR positive patient (177 sera; red dots) and participants randomly selected from the general population (311 sera; green dots). Pearson correlation  $R^2$  values are given for all 578 participants (black text) or for 183 Luminex positive sera (blue text).

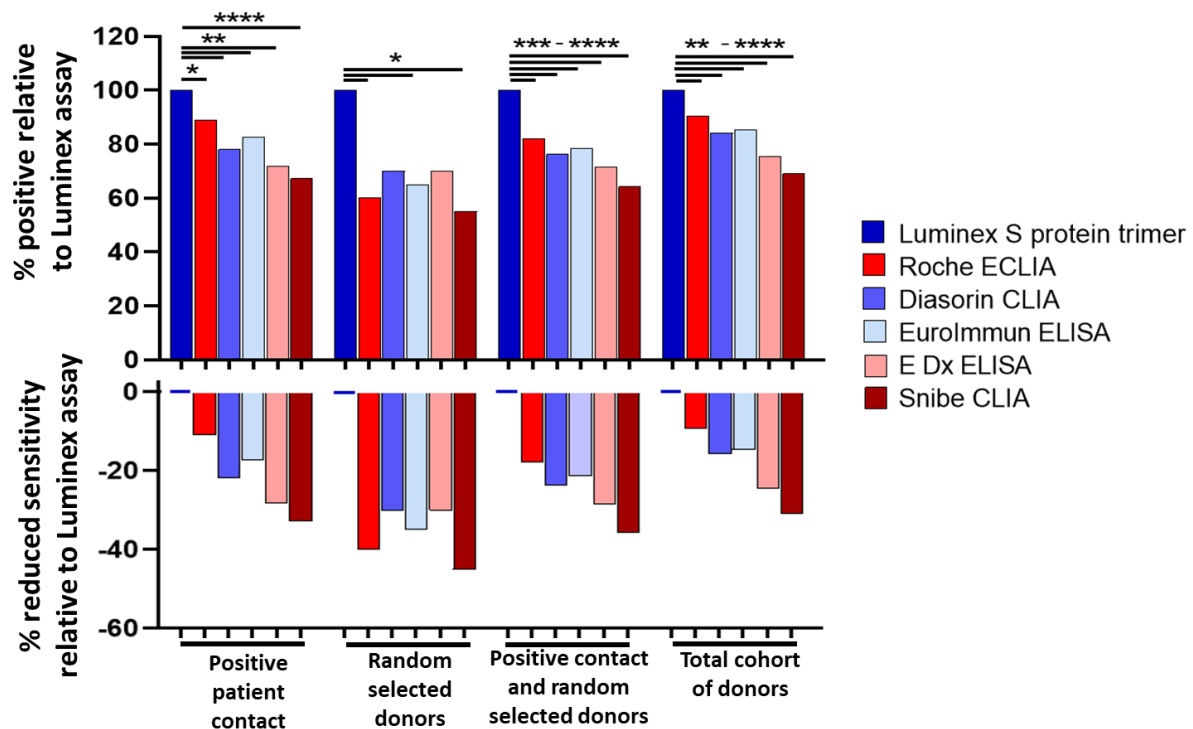

613  
614  
615  
616  
617  
618  
619  
620  
621  
622  
623  
624  
625  
626  
627  
628  
629  
630  
631  
632  
633  
634  
635  
636  
637  
638  
639  
640  
641

**Figure 5: The Luminex S protein trimer assay has significantly increased sensitivity relative to five other commercial assays in detecting seropositive subjects in the post-infection settings.** Analysis shows the percentage seropositive subjects relative to the Luminex assay (top) and the percentage of reduced sensitivity relative to the Luminex assay (bottom) which had the best performance in all subsets of participants. Assays with blue bars used the S protein as their bait for binding serum antibodies while the red bars used the N protein. Statistical analysis was performed using the McNemar test for matched participant samples where  $P < 0.045$  (\*);  $P < 0.0022$  (\*\*);  $P < 0.0009$  (\*\*\*) ;  $P \leq 0.0001$  (\*\*\*\*).

642 **Table 1:** Performance of the serological tests on sera collected during the acute infectious  
 643 stage from hospitalized patients with moderate to severe symptoms  
 644

| Test             | Days post-symptoms | N° sera from patients RT-PCR pos |                      | IgG** Se | IgG** Se 95% CI | N° sera pre-COVID* |                      | IgG** Sp | IgG** Sp 95% CI |
|------------------|--------------------|----------------------------------|----------------------|----------|-----------------|--------------------|----------------------|----------|-----------------|
|                  |                    | Total                            | Positive in serology |          |                 | Total              | Positive in serology |          |                 |
| Luminex          | All                | 94                               | 71                   | 0.76     | 0.66 to 0.83    | 65                 | 0                    | 1        | 0.94 to 1.0     |
|                  | 0-5                | 8                                | 1                    | 0.13     | 0.0064 to 0.47  |                    |                      |          |                 |
|                  | 6-10               | 19                               | 8                    | 0.42     | 0.23 to 0.64    |                    |                      |          |                 |
|                  | 11-15              | 36                               | 33                   | 0.92     | 0.78 to 0.97    |                    |                      |          |                 |
|                  | 16-33              | 29                               | 28                   | 0.97     | 0.83 to 1.0     |                    |                      |          |                 |
| ELISA Epitope Dx | All                | 93                               | 68                   | 0.73     | 0.63 to 0.81    | 65                 | 1                    | 0.98     | 0.92 to 1.0     |
|                  | 0-5                | 7                                | 1                    | 0.14     | 0.0073 to 0.51  |                    |                      |          |                 |
|                  | 6-10               | 18                               | 8                    | 0.44     | 0.25 to 0.66    |                    |                      |          |                 |
|                  | 11-15              | 36                               | 32                   | 0.89     | 0.75 to 0.96    |                    |                      |          |                 |
|                  | 16-33              | 29                               | 26                   | 0.89     | 0.74 to 0.96    |                    |                      |          |                 |
| ELISA Euroimmun  | All                | 91                               | 58                   | 0.64     | 0.53 to 0.73    | 65                 | 2                    | 0.97     | 0.90 to 0.99    |
|                  | 0-5                | 8                                | 1                    | 0.13     | 0.0064 to 0.47  |                    |                      |          |                 |
|                  | 6-10               | 18                               | 5                    | 0.28     | 0.12 to 0.51    |                    |                      |          |                 |
|                  | 11-15              | 34                               | 27                   | 0.79     | 0.63 to 0.90    |                    |                      |          |                 |
|                  | 16-33              | 29                               | 25                   | 0.86     | 0.69 to 0.95    |                    |                      |          |                 |
| CLIA Diasorin    | All                | 96                               | 49                   | 0.51     | 0.41 to 0.61    | 65                 | 0                    | 1        | 0.95 to 1.0     |
|                  | 0-5                | 8                                | 0                    | 0        | 0.0 to 0.32     |                    |                      |          |                 |
|                  | 6-10               | 19                               | 4                    | 0.21     | 0.085 to 0.43   |                    |                      |          |                 |
|                  | 11-15              | 37                               | 21                   | 0.57     | 0.41 to 0.71    |                    |                      |          |                 |
|                  | 16-33              | 29                               | 24                   | 0.83     | 0.65 to 0.92    |                    |                      |          |                 |
| CLIA Suiabe      | All                | 96                               | 60                   | 0.63     | 0.53 to 0.72    | 65                 | 0                    | 1        | 0.95 to 1.0     |
|                  | 0-5                | 8                                | 0                    | 0        | 0.0 to 0.32     |                    |                      |          |                 |
|                  | 6-10               | 19                               | 6                    | 0.32     | 0.15 to 0.54    |                    |                      |          |                 |
|                  | 11-15              | 37                               | 27                   | 0.73     | 0.57 to 0.85    |                    |                      |          |                 |
|                  | 16-33              | 29                               | 26                   | 0.9      | 0.74 to 0.96    |                    |                      |          |                 |
| ECLIA Roche      | All                | 96                               | 68                   | 0.73     | 0.62 to 0.80    | 65                 | 0                    | 1        | 0.95 to 1.0     |
|                  | 0-5                | 8                                | 0                    | 0        | 0.0 to 0.32     |                    |                      |          |                 |
|                  | 6-10               | 19                               | 9                    | 0.47     | 0.27 to 0.68    |                    |                      |          |                 |
|                  | 11-15              | 37                               | 32                   | 0.86     | 0.72 to 0.94    |                    |                      |          |                 |
|                  | 16-33              | 29                               | 27                   | 0.93     | 0.78 to 0.99    |                    |                      |          |                 |

Se : sensitivity ; Sp : specificity ; \* serum sampled before 1st November 2019 considered as “negative”; \*\*IgG, except for the ECLIA Roche, which corresponds to a pan-Ig assay

645  
 646  
 647  
 648  
 649  
 650  
 651  
 652  
 653  
 654  
 655  
 656  
 657  
 658  
 659  
 660  
 661  
 662  
 663  
 664  
 665  
 666  
 667

668 **Table 2.** Performance of the IgA serological tests on 81 sera collected during the acute  
 669 infectious stage from hospitalized patients with moderate to severe symptoms  
 670

| Test                       | Days post-symptoms | N° sera from patients RT-PCR pos |                      | Ig Se | Ig Se 95% CI   |
|----------------------------|--------------------|----------------------------------|----------------------|-------|----------------|
|                            |                    | Total                            | Positive in serology |       |                |
| <b>Luminex IgG</b>         | All                | 81                               | 61                   | 0.75  | 0.65 to 0.83   |
|                            | 0-5                | 9                                | 1                    | 0.11  | 0.006 to 0.44  |
|                            | 6-10               | 16                               | 7                    | 0.44  | 0.23 to 0.67   |
|                            | 11-15              | 36                               | 33                   | 0.92  | 0.78 to 0.97   |
|                            | 16-33              | 20                               | 20                   | 1     | 0.839 to 1     |
| <b>Luminex IgA</b>         | All                | 81                               | 66                   | 0.81  | 0.72 to 0.88   |
|                            | 0-5                | 9                                | 3                    | 0.33  | 0.12 to 0.65   |
|                            | 6-10               | 16                               | 11                   | 0.69  | 0.444 to 0.858 |
|                            | 11-15              | 36                               | 34                   | 0.94  | 0.819 to 0.990 |
|                            | 16-33              | 20                               | 18                   | 0.9   | 0.699 to 0.982 |
| <b>ELISA EuroImmun IgG</b> | All                | 81                               | 49                   | 0.6   | 0.5 to 0.7     |
|                            | 0-5                | 9                                | 1                    | 0.11  | 0.006 to 0.44  |
|                            | 6-10               | 16                               | 5                    | 0.31  | 0.14 to 0.56   |
|                            | 11-15              | 36                               | 25                   | 0.69  | 0.53 to 0.82   |
|                            | 16-33              | 20                               | 18                   | 0.9   | 0.7 to 0.98    |
| <b>ELISA EuroImmun IgA</b> | All                | 81                               | 61                   | 0.75  | 0.65 to 0.83   |
|                            | 0-5                | 9                                | 2                    | 0.22  | 0.039 to 0.55  |
|                            | 6-10               | 16                               | 10                   | 0.63  | 0.39 to 0.82   |
|                            | 11-15              | 36                               | 31                   | 0.86  | 0.71 to 0.94   |
|                            | 16-33              | 20                               | 18                   | 0.9   | 0.7 to 0.98    |

Se : sensitivity ; Sp : specificity

671  
 672  
 673  
 674  
 675  
 676  
 677  
 678  
 679  
 680  
 681  
 682  
 683  
 684  
 685  
 686  
 687  
 688  
 689  
 690  
 691  
 692  
 693  
 694  
 695  
 696



697 **Table 3:** Percentage of positive/negative/limit results of the different tests on sera collected  
 698 from patients with a documented positive SARS-CoV-2 RT-PCR (90 sera), contacts with a SARS-  
 699 CoV-2 RT-PCR positive patient (177 sera) and subjects randomly selected from the general  
 700 population (311 sera).

701  
702  
703  
704

|                 | Luminex (anti-S trimer) |    |                           |     |                            |     | Diasorin (anti-S) |    |                           |     |                            |     | EuroImun (anti-S) |    |                           |     |                            |     |
|-----------------|-------------------------|----|---------------------------|-----|----------------------------|-----|-------------------|----|---------------------------|-----|----------------------------|-----|-------------------|----|---------------------------|-----|----------------------------|-----|
|                 | Positive RT-PCR         |    | Patient positive contacts |     | Subjects randomly selected |     | Positive RT-PCR   |    | Patient positive contacts |     | Subjects randomly selected |     | Positive RT-PCR   |    | Patient positive contacts |     | Subjects randomly selected |     |
|                 | %                       | N  | %                         | N   | %                          | N   | %                 | N  | %                         | N   | %                          | N   | %                 | N  | %                         | N   | %                          | N   |
| <b>Positive</b> | 96.7                    | 87 | 36.2                      | 64  | 6.4                        | 20  | 88.9              | 80 | 28.2                      | 50  | 4.5                        | 14  | 88.9              | 80 | 29.9                      | 53  | 4.2                        | 13  |
| <b>Negative</b> | 2.2                     | 2  | 62.7                      | 111 | 90.7                       | 282 | 8.9               | 8  | 70.6                      | 125 | 95.2                       | 296 | 6.7               | 6  | 68.9                      | 122 | 94.9                       | 295 |
| <b>Limit</b>    | 1.1                     | 1  | 1.1                       | 2   | 2.9                        | 9   | 2.2               | 2  | 1.1                       | 2   | 0.3                        | 1   | 4.4               | 4  | 1.1                       | 2   | 1.0                        | 3   |

|                 | Roche (anti-N)  |    |                           |     |                            |     | Epitope Dx (anti-N) |    |                           |     |                            |     | Snibe (anti-S + N) |    |                           |     |                            |     |
|-----------------|-----------------|----|---------------------------|-----|----------------------------|-----|---------------------|----|---------------------------|-----|----------------------------|-----|--------------------|----|---------------------------|-----|----------------------------|-----|
|                 | Positive RT-PCR |    | Patient positive contacts |     | Subjects randomly selected |     | Positive RT-PCR     |    | Patient positive contacts |     | Subjects randomly selected |     | Positive RT-PCR    |    | Patient positive contacts |     | Subjects randomly selected |     |
|                 | %               | N  | %                         | N   | %                          | N   | %                   | N  | %                         | N   | %                          | N   | %                  | N  | %                         | N   | %                          | N   |
| <b>Positive</b> | 95.6            | 86 | 32.2                      | 57  | 3.9                        | 12  | 76.7                | 69 | 26.0                      | 46  | 4.5                        | 14  | 71.1               | 64 | 24.3                      | 43  | 3.5                        | 11  |
| <b>Negative</b> | 4.4             | 4  | 67.8                      | 120 | 96.1                       | 299 | 17.8                | 16 | 70.6                      | 125 | 93.6                       | 291 | 28.9               | 26 | 75.7                      | 134 | 96.5                       | 300 |
| <b>Limit</b>    | 0.0             | 0  | 0.0                       | 0   | 0.0                        | 0   | 5.6                 | 5  | 3.4                       | 6   | 1.9                        | 6   | 0.0                | 0  | 0.0                       | 0   | 0.0                        | 0   |

705  
706  
707  
708  
709  
710  
711  
712  
713  
714  
715  
716  
717  
718  
719  
720  
721  
722  
723  
724  
725  
726  
727  
728  
729

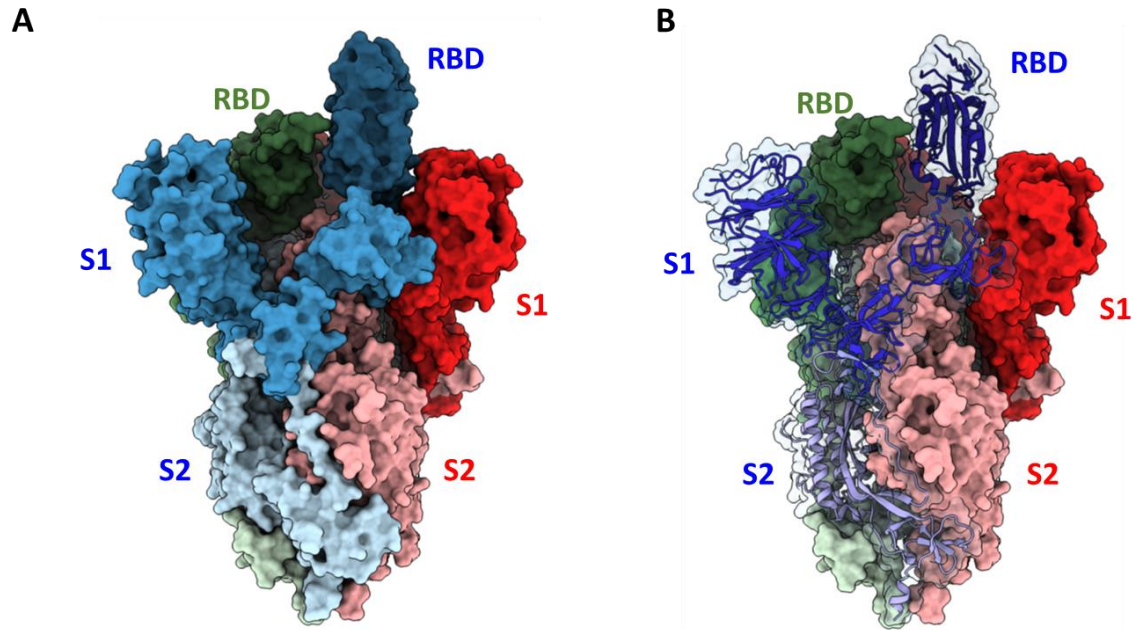

730  
731  
732  
733  
734  
735  
736  
737  
738  
739  
740  
741  
742  
743  
744  
745  
746  
747  
748  
749  
750

**Supplementary Figure 1: Structural representation of the SARS-CoV-2 S protein Trimer.** A) Space filled representation of the S protein with trimer subunits shown in blue, red and green. The labeled S2, S1 and RBD portions of each subunit are in light, mid and dark colors, respectively. Compared to the monomeric S1 protein, this image demonstrates that the native S protein trimer has significantly greater conformational for antibody binding with epitopes that are only present in the higher order structure. B) S protein trimer with the blue subunit represented as a ribbon structural. The 6VSB PDB structure was used to generate these images.

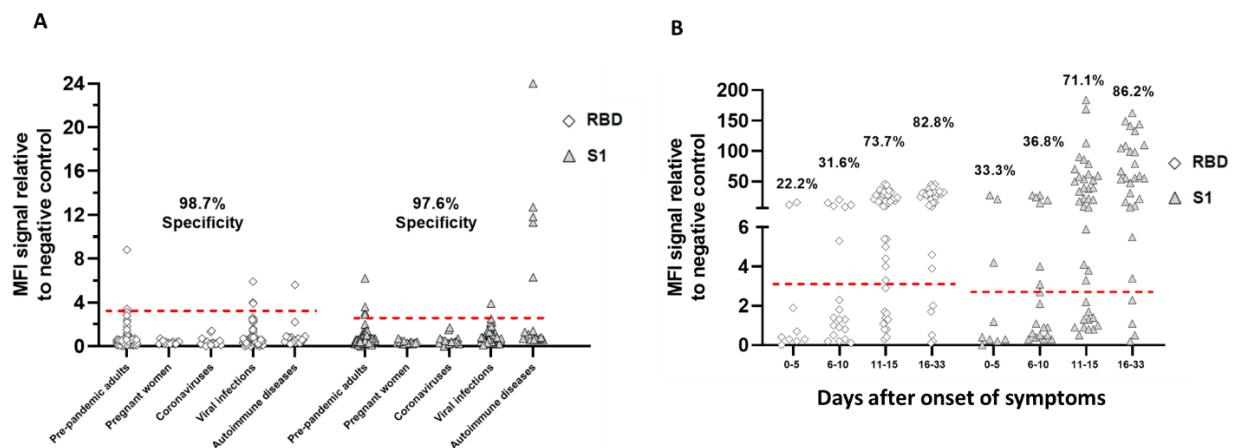

751  
752

753 **Supplementary Figure 2:** Specificity and sensitivity of IgG antibody binding to the SARS-CoV-  
754 2 RBD and S1 domains in a Luminex binding assay. A) Specificity of the Luminex RBD and S1  
755 protein monomer binding assays was assessed using the cohort of negative control sera  
756 described in Figure 1A. B) Sensitivity of the Luminex RBD and S1 protein monomer binding  
757 assays was determined with the 94 acute infected serum samples described in Figure 1B. The  
758 cut-off for positivity used in the RBD and S1 Luminex IgG assays are 3.2- and 2.8-fold over the  
759 negative control, respectively and were established by using mean value + 4×SD of each for  
760 the 364 pre-COVID-19 pandemic serum samples in A.

761

762

763

#### 764 **Acknowledgements**

765 We would like to thank the Service of Immunology and Allergy and Service of Microbiology at  
766 the Lausanne University Hospital for their contributions in analysis of subject serum samples.  
767 Additionally, we would like to thank Laurence Durrer and Soraya Quinche from PTPSP-EPFL  
768 for mammalian cell culture; and Luciano Abriata from PTPSP-EPFL for helping in purification  
769 of the S protein trimer. We would also like to thank Professor Federica Sallusto from the  
770 Institute for Research in Biomedicine in Bellinzona, Switzerland for her assistance in cross  
771 validating the sensitivity and specificity of the Luminex S protein trimer assay by an  
772 independent laboratory. Funding for this project was provided through the Lausanne  
773 University Hospital, through the Swiss Vaccine research institute and through the Coronavirus  
774 Accelerated R&D in Europe (CARE) IMI project.

775

#### 776 **Author contributions**

777 A.C and A.T.C. organized the testing of serum samples in the five commercial serological  
778 assays and contributed to data analysis and manuscript preparation; C.A. and C.P. organized  
779 the testing of sera with the Luminex assay and solidified the testing protocol into a robust  
780 diagnostics assay; A.F. prepared all batches protein coupled Luminex beads and performed  
781 validation studies along with J.C.; D.T., F.P., D.H. and K.L. produced and purified the S protein  
782 trimer; B.-J.B. provided the S1 and RBD monomeric proteins; V.D'A., S.G.N. and M.B. were in  
783 charge of the Vaud post-infection cohort and performed the initial unblinded analysis; C.F.  
784 conceived of and designed the Luminex assays, the quantitative analysis strategies and  
785 contributed to data analysis and manuscript writing. D.T., G.G. and G.P. conceived the study  
786 design for testing of sera from acute and post-infection subjects and wrote the manuscript.

787 **References:**

- 788
- 789 1. WHO. Coronavirus disease (COVID-2019) situation reports -175. Vol. July 12th, 2020 (2020).
- 790 2. Norheim, O.F. Protecting the population with immune individuals. *Nat Med* **26**, 823-824
- 791 (2020).
- 792 3. Phelan, A.L. COVID-19 immunity passports and vaccination certificates: scientific, equitable,
- 793 and legal challenges. *Lancet* **395**, 1595-1598 (2020).
- 794 4. Weitz, J.S., *et al.* Modeling shield immunity to reduce COVID-19 epidemic spread. *Nat Med*
- 795 **26**, 849-854 (2020).
- 796 5. Li, G., Chen, X. & Xu, A. Profile of specific antibodies to the SARS-associated coronavirus. *N*
- 797 *Engl J Med* **349**, 508-509 (2003).
- 798 6. Zhao, J., *et al.* Antibody responses to SARS-CoV-2 in patients of novel coronavirus disease
- 799 2019. *Clin Infect Dis* (2020).
- 800 7. Meyer, B., Drosten, C. & Muller, M.A. Serological assays for emerging coronaviruses:
- 801 challenges and pitfalls. *Virus Res* **194**, 175-183 (2014).
- 802 8. Coste, A.T., Jatou, K., Papadimitriou-Olivgeris, M., Greub, G. & Croxatto, A. Comparison of
- 803 SARS-CoV-1 2 serological tests with different antigen targets. *medRxiv* (2020).
- 804 9. Chia, W.N., *et al.* Serological differentiation between COVID-19 and SARS infections. *Emerg*
- 805 *Microbes Infect* **9**, 1497-1505 (2020).
- 806 10. Cao, W.C., Liu, W., Zhang, P.H., Zhang, F. & Richardus, J.H. Disappearance of antibodies to
- 807 SARS-associated coronavirus after recovery. *N Engl J Med* **357**, 1162-1163 (2007).
- 808 11. Choe, P.G., *et al.* MERS-CoV Antibody Responses 1 Year after Symptom Onset, South
- 809 Korea, 2015. *Emerg Infect Dis* **23**, 1079-1084 (2017).
- 810 12. Wu, L.P., *et al.* Duration of antibody responses after severe acute respiratory syndrome.
- 811 *Emerg Infect Dis* **13**, 1562-1564 (2007).
- 812 13. Payne, D.C., *et al.* Persistence of Antibodies against Middle East Respiratory Syndrome
- 813 Coronavirus. *Emerg Infect Dis* **22**, 1824-1826 (2016).
- 814 14. Xiaoqin Guo, X., *et al.* Long-Term Persistence of IgG Antibodies in SARS-CoV Infected
- 815 Healthcare Workers. *medRxiv* (2020).
- 816 15. Yuan, M., *et al.* A highly conserved cryptic epitope in the receptor binding domains of SARS-
- 817 CoV-2 and SARS-CoV. *Science* **368**, 630-633 (2020).
- 818 16. Stringhini, S., *et al.* Seroprevalence of anti-SARS-CoV-2 IgG antibodies in Geneva,
- 819 Switzerland (SEROCoV-POP): a population-based study. *Lancet* (2020).
- 820 17. Gobierno de España, Ministerio de Sanidad. Estudio ENE-COVID19: primera ronda. Estudio
- 821 nacional de sero-epidemiología de la infección por SARS-CoV-2 en España.
- 822 18. Saplakoglu, Y. 1 in 5 people tested in New York City had antibodies for the coronavirus. .
- 823 *LiveScience* (2020).
- 824 19. Coste, A.T., Jatou, K., Papadimitriou-Olivgeris, M., Croxatto, A. & Greub, G. Indication for
- 825 SARS-CoV-2 serology: first month follow-up. *medRxiv* (2020).
- 826 20. Montesinos, I., *et al.* Evaluation of two automated and three rapid lateral flow immunoassays
- 827 for the detection of anti-SARS-CoV-2 antibodies. *J Clin Virol* **128**, 104413 (2020).
- 828 21. Kohmer, N., Westhaus, S., Ruhl, C., Ciesek, S. & Rabenau, H.F. Brief clinical evaluation of
- 829 six high-throughput SARS-CoV-2 IgG antibody assays. *J Clin Virol* **129**, 104480 (2020).
- 830 22. Long, Q.X., *et al.* Clinical and immunological assessment of asymptomatic SARS-CoV-2
- 831 infections. *Nat Med* (2020).
- 832 23. Greub, G., Coste, A.T. & Croxatto, A. Sérologie SARS-CoV-2: quand la prescrire? *Pipette -*
- 833 *Swiss Laboratory Medicine*, 14-15 (2020).
- 834 24. Longchamp, A., *et al.* Serum antibody response in critically ill patients with COVID-19.
- 835 *Intensive Care Med* (2020).
- 836 25. Wrapp, D., *et al.* Cryo-EM Structure of the 2019-nCoV Spike in the Prefusion Conformation.
- 837 *bioRxiv* (2020).
- 838 26. Okba, N.M.A., *et al.* Severe Acute Respiratory Syndrome Coronavirus 2-Specific Antibody
- 839 Responses in Coronavirus Disease Patients. *Emerg Infect Dis* **26**, 1478-1488 (2020).
- 840 27. Corman, V.M., *et al.* Detection of 2019 novel coronavirus (2019-nCoV) by real-time RT-PCR.
- 841 *Euro Surveill* **25**(2020).
- 842 28. Greub, G., Sahli, R., Brouillet, R. & Jatou, K. Ten years of R&D and full automation in
- 843 molecular diagnosis. *Future Microbiol* **11**, 403-425 (2016).
- 844
- 845
